# Supplementary material
Source: publisher figshare collection journal article supplement (https://acs.figshare.com/ndownloader/files/4133833)

## **Supporting Information**

### **Supplemental tables:**

**Table S1. The amino acid sequences and chemical formulas of cyclopeptides.**

**Table S2. Cyclolinopeptide recovery from gum/phosphoric acid residues after acid degumming of flaxseed oil.**

### **Supplemental figures:**

**Figure S1. The structures of cyclopeptides. Taken from Gui et al. (2012)<sup>20</sup> with permission.**

**Figure S2. Flaxseed fractions after water degumming and manual dissection: (A) whole seed (B) mucilage (C) cotyledon, and (D) seed coat.**

**Figure S3. Products after cold pressing of flaxseed: (A) whole seed, (B) flaxseed meal, (C) crude oil after settling, and (D) sediment separated from crude oil.**

### **Supplemental file:**

**File S1. Electrospray ionization mass spectrometry spectra of standard Seg-A and cyclolinopeptides**

The standard peptide was prepared in a solution containing 90% methanol, 10% water and 0.1% formic acid in a total volume of 1 mL for mass spectrometry (MS) analysis. MS analysis was performed on a Hybrid Quadrupole-TOF LC/MS/MS system. The solution was introduced into the turbo ion electrospray spectrometer source by loop injection at a rate of 5  $\mu$ L per min. Ion scanning experimental data was acquired with the pulsing function turned on, using a dwell time of 50 ms and the step size of one Dalton. All signals were created and analyzed by the Analyst QS 1.1 software.

**Table S1. The Amino Acid Sequences and Chemical Formulas of Cyclopeptides**

| cyclopeptide (code)             | amino acid sequence <sup>a</sup>                    | molecular formula                                                             | protonated ion mass (m/z) <sup>b</sup> |
|---------------------------------|-----------------------------------------------------|-------------------------------------------------------------------------------|----------------------------------------|
| Seg-A                           | <i>cyclo</i> -(Gly-Val-Pro-Val-Trp-Ala)             | C <sub>31</sub> H <sub>43</sub> N <sub>7</sub> O <sub>6</sub>                 | 610.32 <sup>20</sup>                   |
| Cyclolinopeptide A ( <b>1</b> ) | <i>cyclo</i> -(Ile-Leu-Val-Pro-Pro-Phe-Phe-Leu-Ile) | C <sub>57</sub> H <sub>85</sub> N <sub>9</sub> O <sub>9</sub>                 | 1040.65 <sup>1</sup>                   |
| Cyclolinopeptide B ( <b>2</b> ) | <i>cyclo</i> -(Met-Leu-Ile-Pro-Pro-Phe-Phe-Val-Ile) | C <sub>56</sub> H <sub>83</sub> N <sub>9</sub> O <sub>9</sub> S               | 1058.61 <sup>6</sup>                   |
| Cyclolinopeptide C ( <b>3</b> ) | <i>cyclo</i> -(Mso-Leu-Ile-Pro-Pro-Phe-Phe-Val-Ile) | C <sub>56</sub> H <sub>83</sub> N <sub>9</sub> O <sub>10</sub> S              | 1074.56 <sup>6</sup>                   |
| Cyclolinopeptide D ( <b>4</b> ) | <i>cyclo</i> -(Mso-Leu-Leu-Pro-Phe-Phe-Trp-Ile)     | C <sub>57</sub> H <sub>77</sub> N <sub>9</sub> O <sub>9</sub> S               | 1064.54 <sup>6</sup>                   |
| Cyclolinopeptide E ( <b>5</b> ) | <i>cyclo</i> -(Mso-Leu-Val-Phe-Pro-Leu-Phe-Ile)     | C <sub>51</sub> H <sub>76</sub> N <sub>8</sub> O <sub>9</sub> S               | 977.52 <sup>6</sup>                    |
| Cyclolinopeptide F ( <b>6</b> ) | <i>cyclo</i> -(Mso-Leu-Mso-Pro-Phe-Phe-Trp-Val)     | C <sub>55</sub> H <sub>73</sub> N <sub>9</sub> O <sub>10</sub> S <sub>2</sub> | 1084.47 <sup>7</sup>                   |
| Cyclolinopeptide G ( <b>7</b> ) | <i>cyclo</i> -(Mso-Leu-Mso-Pro-Phe-Phe-Trp-Ile)     | C <sub>56</sub> H <sub>75</sub> N <sub>9</sub> O <sub>10</sub> S <sub>2</sub> | 1098.50 <sup>7</sup>                   |

Taken from Gui et al. (2012)<sup>20</sup> with permission.

<sup>a</sup> The first and/or third positions of amino acid sequences are displayed in Figure S1. Abbreviations are Met for methionine and Mso for methionine sulfoxide.

<sup>b</sup> From reference and ESI-MS data obtained as described in File S1 (Supplemental file).

**Table S2. Cyclolinopeptide Recovery from Gum/phosphoric Acid Residues After Acid Degumming of Flaxseed Oil**

| fraction<br><br>(n=3) <sup>a</sup> | concentration of cyclolinopeptides (µg/g) |                 |              |             |              |            |             |               |
|------------------------------------|-------------------------------------------|-----------------|--------------|-------------|--------------|------------|-------------|---------------|
|                                    | 1                                         | 2               | 3            | 4           | 5            | 6          | 7           | Total         |
| Gum/phosphoric acid <sup>b</sup>   | 238.5 ± 3.9                               | ND <sup>c</sup> | 250.2 ± 7.7  | ND          | 233.4 ± 10.9 | 13.4 ± 1.5 | 24.0 ± 2.6  | 759.5 ± 26.6  |
| Crude oil <sup>d</sup>             | 454.0 ± 16.1                              | 90.5 ± 7.8      | 358.3 ± 15.5 | 214.1 ± 4.3 | 445.5 ± 14.7 | 82.4 ± 4.5 | 249.7 ± 3.7 | 1894.6 ± 66.6 |

<sup>a</sup> Fraction separations after refining treatments were repeated three times.

<sup>b</sup> Cyclolinopeptides recovery from the gum/phosphoric acid of equivalent to 1 mL oil

<sup>c</sup> Not detected by HPLC.

<sup>d</sup> Crude oil from the same fresh oil (Table 4, VI) without treatment.

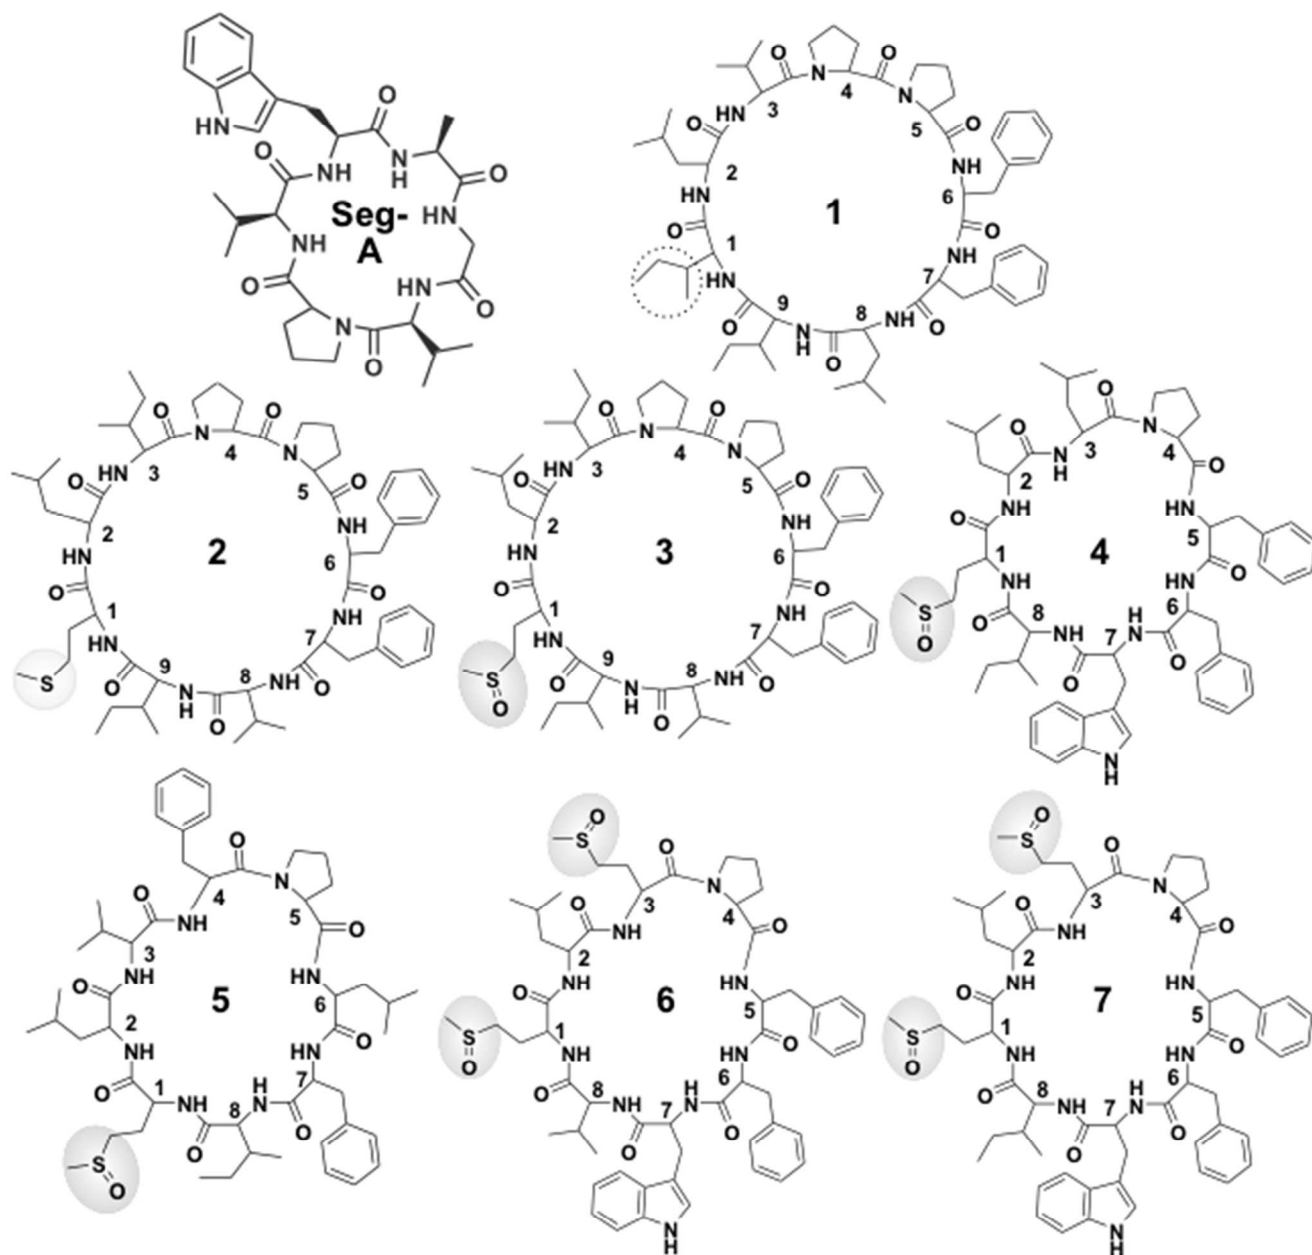

Figure S1.

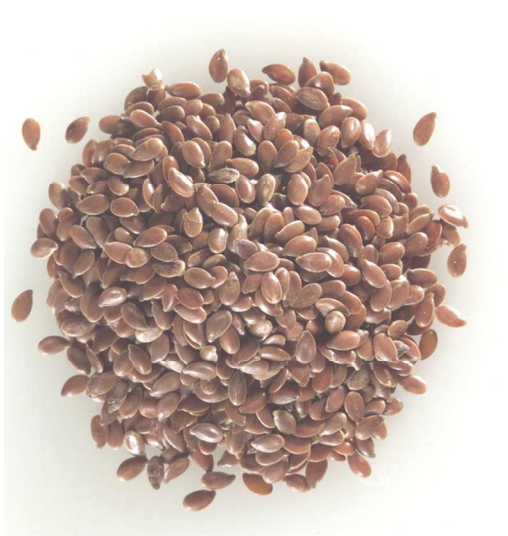

**(A)**

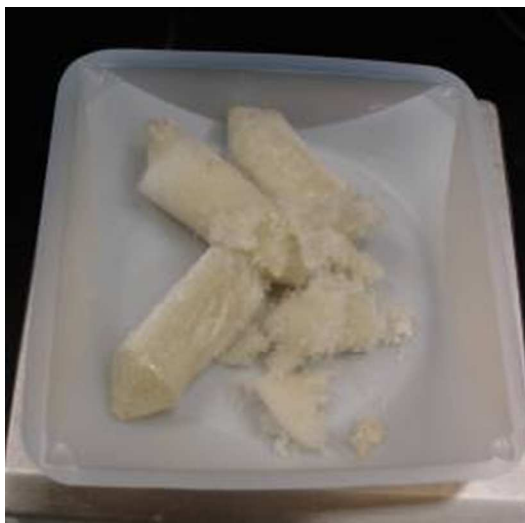

**(B)**

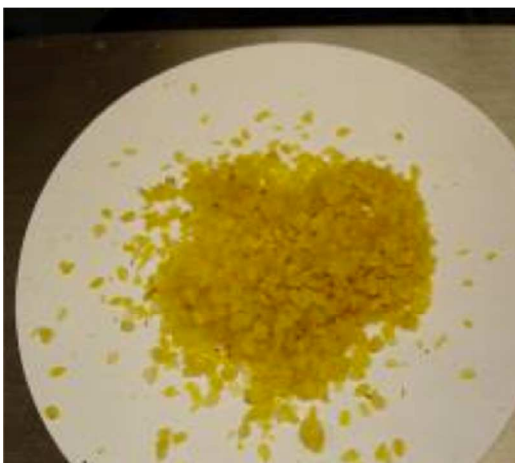

**(C)**

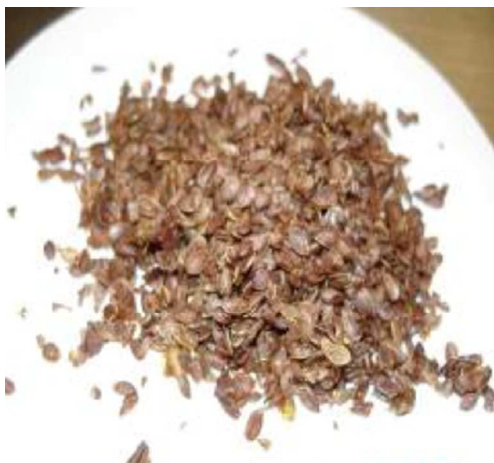

**(D)**

**Figure S2.**

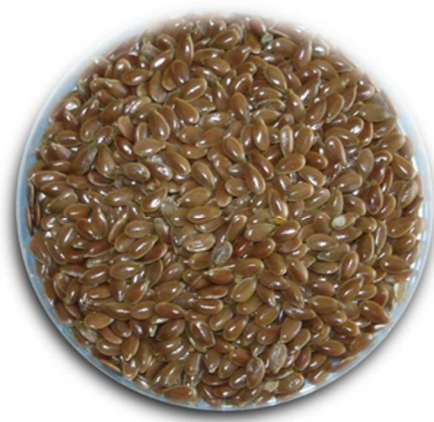

(A)

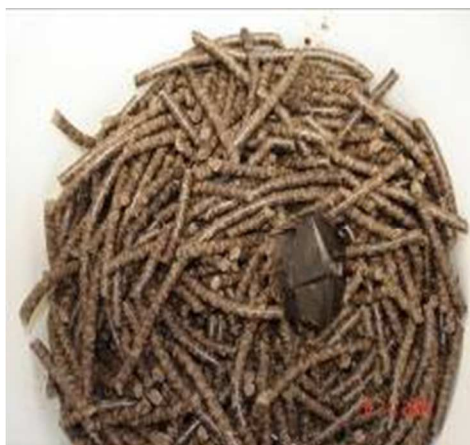

(B)

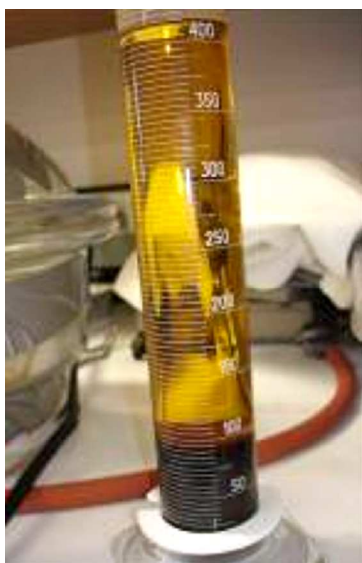

(C)

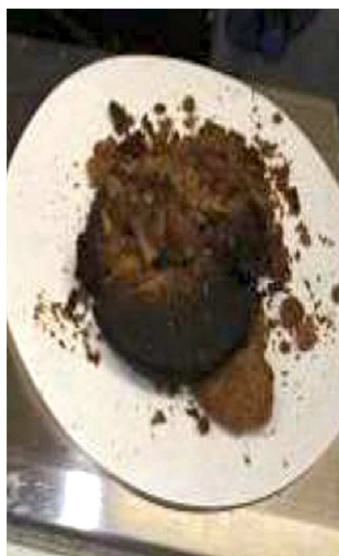

(D)

**Figure S3.**

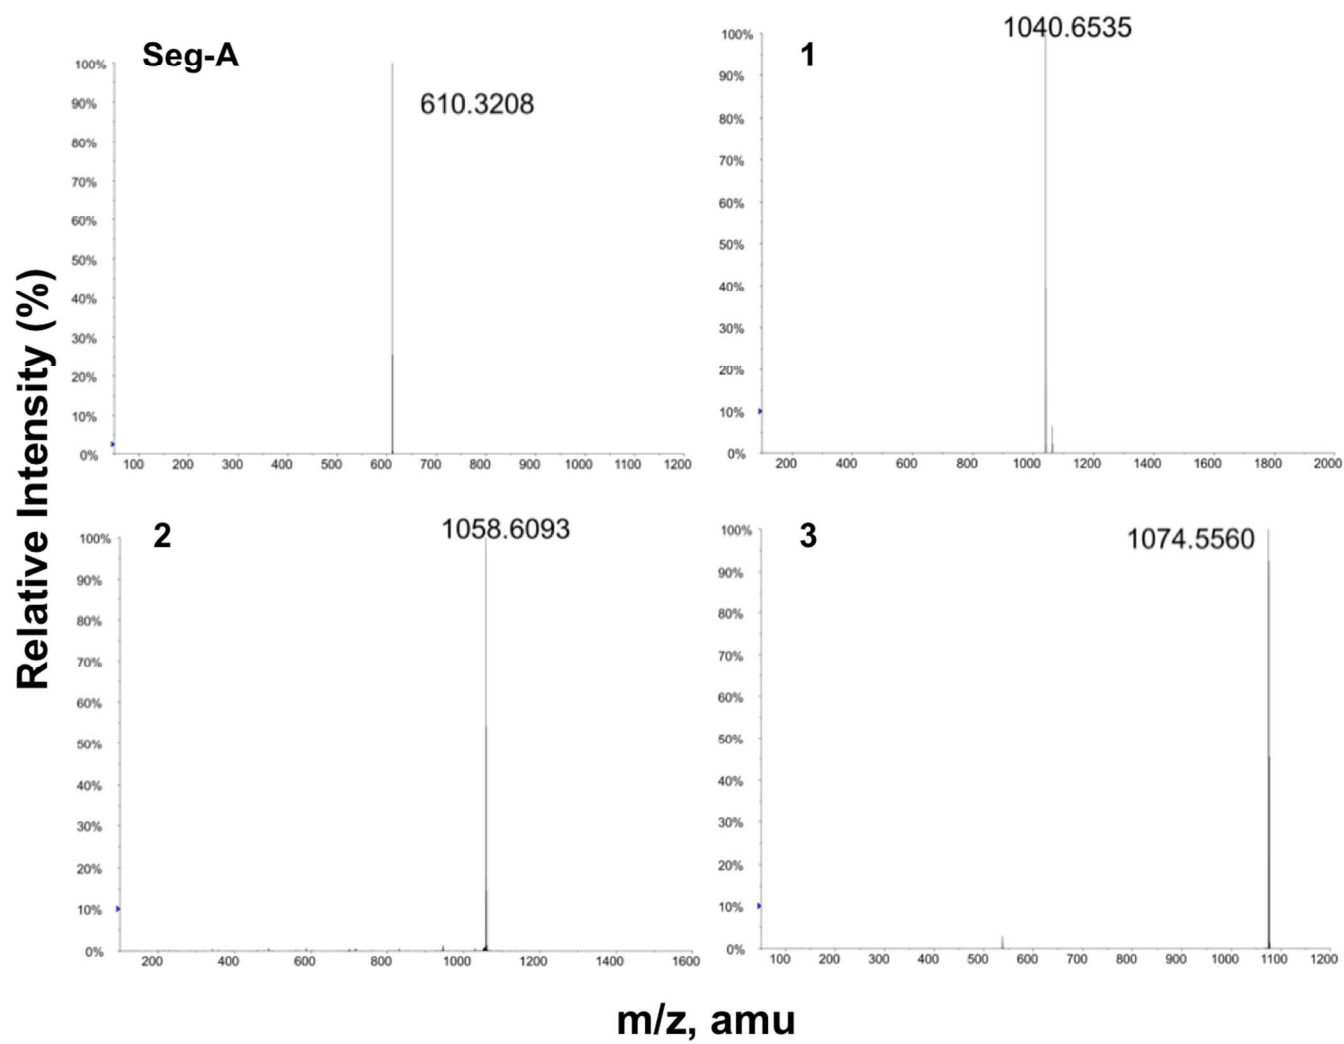

File S1.

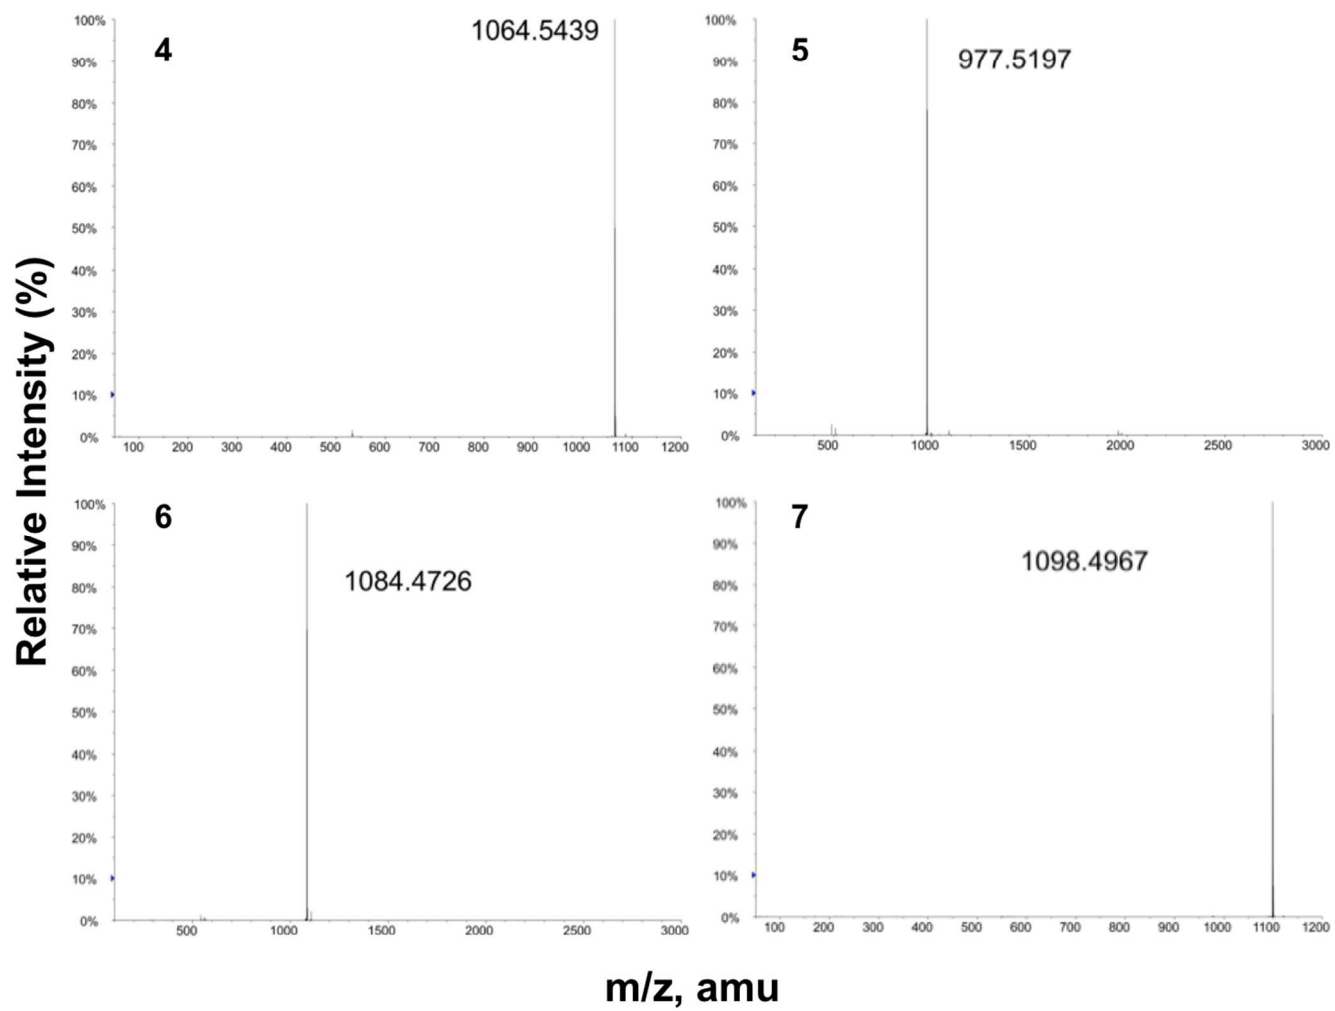

Supplement: Supplementary file 1 [file 4133833]
